# Supplementary material
Source: ML conference proceedings conference paper supplement (https://openaccess.thecvf.com/content/ICCV2023/html/Liu_Real-Time_Neural_Rasterization_ICCV_2023_paper.html)
Supplement: Supplementary file 1 [file Liu_Real-Time_Neural_Rasterization_ICCV_2023_supplemental.zip]

Archive with 2 entries (2 files):
- neuras_supp_o.mp4
- supp.pdf
